# Supplementary material for: Placental weight and its relationship with the birth weight of term infants and body mass index of the mothers
Source: PubMed Central journal article supplement — J Int Med Res. 2023 May 16;51(5):03000605231172895. doi: 10.1177/03000605231172895 (PMC10192661; doi:10.1177/03000605231172895), 2023-05-16
Supplement: sj-pdf-1-imr-10.1177_03000605231172895.pdf [file sj-pdf-1-imr-10.1177_03000605231172895.pdf]

# Ethics Review Committee

## Teaching Hospital Jaffna

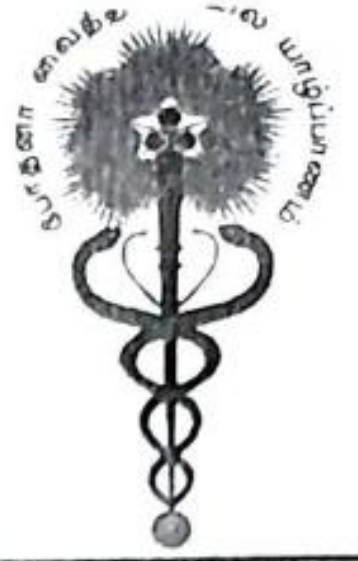

### Chairperson

**Dr.C.S.Jamunanantha**  
Deputy Director  
email:jamunanantha@gmail.com

### Secretary

**Dr.Brammah R.Thangaraja**  
Consultant Nephrologist  
email:brammahin@gmail.com

### Members

**Dr.R.Kesavan**  
Consultant Community  
Physician  
email:dr\_kesavan@yahoo.com

**Dr.S.K.Arulmoli**  
Consultant Paediatrician  
email:k\_arulmoli@yahoo.com

**Dr.V.Sutharshan**  
Consultant Surgeon  
email:sutha766@gmail.com

**Dr.T.Peranantharajah**  
Consultant Physician  
email:peranantha@gmail.com

**Dr.U.Mayorathan**  
Consultant JMO  
email:mayo74514@yahoo.com

**Dr.A.Sritharan**  
Consultant Obs & Gyn  
email:dayasri92@yahoo.com

**Dr.T.Sooriyakumar**  
Consultant Haematologist  
email:tsooriyakumar@yahoo.com

**Dr.T.Gobishankar**  
Consultant Orthopaedic  
Surgeon  
email:rtgoby@yahoo.com

**Dr.V.Thusyanthan**  
Consultant Gastroenterological  
Surgeon  
email:vthusyanthan2003@yahoo.co.uk

**Dr. (Mrs.)N.Gnanapragash**  
Consultant Physician  
email:nveeravagu22@yahoo.com

**Mrs.Robinsa Nakkeeran**  
Legal Officer, Legal Aid  
Commission of Sri Lanka  
email:rrobinsa@gmail.com

**Mr.L.Ilangovan**  
Secretary, Ministry of Local  
Government, Northern Province  
email:ilaangovan@gmail.com

17/10/2022

Dr.S.Raveendran,  
Senior Registrar,  
PGIM.

**Study Name: Placental weight and its relationship with the  
birth weight of term infants in the professorial  
unit/Teaching Hospital Jaffna, Sri Lanka**

**(Reg.No: S04/01/2022)**

Above study was granted Ethical Clearance on the meeting held on  
03/02/2022

Ethical clearance would be valid for a period of one year from the  
date of 03/02/2022.

Thank you.

Yours

Sincerely,

  
.....**Dr. Brammah R Thangarajah**  
MD(MOS), MD(Col), MRCP(Lon), ESE Neph  
SLMC Reg. No. 23458  
Senior Lecturer  
University Medical Unit-University of Jaffna  
Honorary Consultant Nephrologist  
Teaching Hospital, Jaffna

Secretary

  
.....**Dr. C. S. Jamunanantha**  
Deputy Director  
Teaching Hospital  
Jaffna

Dr.C.S.Jamunanantha  
Chair person
