# Supplementary material for: Placental weight and its relationship with the birth weight of term infants and body mass index of the mothers
Source: PubMed Central journal article supplement — J Int Med Res. 2023 May 16;51(5):03000605231172895. doi: 10.1177/03000605231172895 (PMC10192661; doi:10.1177/03000605231172895), 2023-05-16
Supplement: sj-pdf-2-imr-10.1177_03000605231172895.pdf [file sj-pdf-2-imr-10.1177_03000605231172895.pdf]

## **Statements and Declarations**

### **Declaration of conflicting interests**

The author(s) declared no potential conflicts of interest concerning this article's research, authorship, and/or publication.

### **Funding**

The author(s) received no financial support for this article's research, authorship, and/or publication.

### **Supplementary Material**

Supplementary material for this paper can be shared on request.

### **ORCID ID**

Munasinghe BM. <http://orcid.org/0000-0001-8373-4752>
